# Supplementary material for: CH/π interactions in methane clusters with polycyclic aromatic hydrocarbons
Source: Royal Society of Chemistry journal article supplement (doi:10.1039/b718550b), 2008-01-01
Supplement: b718550b.pdf [file b718550b.pdf]

## **CH/ $\pi$ interactions in methane clusters with polycyclic aromatic hydrocarbons**

Seiji Tsuzuki,<sup>\*a</sup> Kazumasa Honda,<sup>a</sup> Asuka Fujii,<sup>b</sup> Tadafumi Uchimaru<sup>a</sup> and Masuhiro Mikami<sup>a</sup>

<sup>a</sup> National Institute of Advanced Industrial Science and Technology, Tsukuba, Ibaraki 305-8568, Japan. Fax: (+81) 29 851 5426; Tel: (+81) 29 861 9288; E-mail: [s.tsuzuki@aist.go.jp](mailto:s.tsuzuki@aist.go.jp)

<sup>b</sup> Department of Chemistry, Graduate School of Science, Tohoku University, Sendai 980-8578, Japan

### **Supplementary Information**

#### **Estimation of $E_{\text{MP2}}(\text{limit})$ by extrapolation**

The  $E_{\text{MP2}}(\text{limit})$  for the naphthalene-methane and pyrene-methane clusters were estimated by Helgaker's method from calculated  $E_{\text{MP2}}$  using the cc-pVDZ and cc-pVTZ basis sets. In Helgaker's method calculated  $E_{\text{MP2}}$  were fitted to a form  $a + b X^{-3}$  (where  $X$  is 2 for cc-pVDZ and 3 for cc-pVTZ).  $E_{\text{MP2}}(\text{limit})$  was then estimated by an extrapolation. Helgaker's method was originally proposed for estimation of electron correlation contribution at the basis set limit. But we have used this method for estimation of  $E_{\text{MP2}}(\text{limit})$ , since a basis set dependence of  $E_{\text{HF}}$  is negligible.

#### **Estimation procedure of CCSD(T) level interaction energy at the basis set limit**

The strong basis set dependence and substantial electron correlation effects beyond MP2 show that an estimation of the CCSD(T) interaction energy at the basis set limit [ $E_{\text{CCSD(T)}}(\text{limit})$ ] is necessary for a quantitative analysis of interaction energy between a methane and a poly-aromatic molecule.  $E_{\text{CCSD(T)}}(\text{limit})$  for a methane cluster with a poly aromatic molecule was estimated with ARS-E models in this work. In this models the  $E_{\text{CCSD(T)}}(\text{limit})$  was estimated according to equation (1)

$$E_{\text{CCSD(T)}}(\text{limit}) = E_{\text{MP2}}(\text{limit}) + \Delta\text{CCSD(T)}(\text{limit}), \quad (1)$$

where  $\Delta\text{CCSD(T)}(\text{limit})$  denotes the CCSD(T) correction term [ $\Delta\text{CCSD(T)} = \text{ECCSD(T)} - \text{EMP2}$ ] at the basis set limit. EMP2 and ECCSD(T) denote MP2 and CCSD(T) interaction energies. EMP2(limit) denotes the EMP2 at the basis set limit estimated by Helgaker's method.

The  $\Delta\text{CCSD(T)}(\text{limit})$  was estimated by equation (2)

$$\Delta\text{CCSD(T)}(\text{limit}) = \Delta\text{CCSD(T)}(\text{M}) + \Delta(\text{M})\Delta\text{CCSD(T)}, \quad (2)$$

where  $\Delta\text{CCSD(T)}(\text{M})$  denotes  $\Delta\text{CCSD(T)}$  obtained using a Medium size basis set. The  $\Delta\text{CCSD(T)}$  has a weak basis set dependence.  $\Delta(\text{M})\Delta\text{CCSD(T)}$  is a correction term for slight underestimation of the  $\Delta\text{CCSD(T)}$  by the Medium size basis set. The  $\Delta(\text{M})\Delta\text{CCSD(T)}$  corresponds to a difference between the  $\Delta\text{CCSD(T)}$  at the basis set limit [ $\Delta\text{CCSD(T)}(\text{limit})$ ] and the  $\Delta\text{CCSD(T)}(\text{M})$ .

The  $\Delta(\text{M})\Delta\text{CCSD(T)}$  was estimated according to equation (3)

$$\begin{aligned} \Delta(\text{M})\Delta\text{CCSD(T)} &= F_{\Delta\text{CCSD(T)}} \times \Delta(\text{M})E_{\text{corr}}(\text{MP2}) \\ &= F_{\Delta\text{CCSD(T)}} \times [E_{\text{corr}}(\text{MP2})(\text{limit}) - E_{\text{corr}}(\text{MP2})(\text{M})], \end{aligned} \quad (3)$$

where  $E_{\text{corr}}(\text{MP2})(\text{M})$  denotes  $E_{\text{corr}}(\text{MP2}) (= \text{EMP2} - \text{EHF})$  obtained using the Medium size basis set.  $\Delta(\text{M})E_{\text{corr}}(\text{MP2}) [= E_{\text{corr}}(\text{MP2})(\text{limit}) - E_{\text{corr}}(\text{MP2})(\text{M})]$  is underestimation of the  $E_{\text{corr}}(\text{MP2})$  by the Medium size basis set.  $F_{\Delta\text{CCSD(T)}}$  is a parameter used for estimation of the  $\Delta(\text{M})\Delta\text{CCSD(T)}$ . Calculated ECCSD(T) for methane clusters with benzene, naphthalene, pyrene, toluene, *p*-xylene and mesitylene using several basis sets (Table 1S) show that the  $\Delta\text{CCSD(T)}$  is almost always 75-85 % of the absolute value of  $E_{\text{corr}}(\text{MP2})$ . These results suggest that we can assume that the  $\Delta(\text{M})\Delta\text{CCSD(T)}$  is approximately  $20 \pm 5 \%$  of the absolute value of  $\Delta(\text{M})E_{\text{corr}}(\text{MP2})$ . Therefore  $F_{\Delta\text{CCSD(T)}} = -0.20$  was used for the estimation of  $\Delta(\text{M})\Delta\text{CCSD(T)}$  using equation (3) in this work. The 6-31G\* basis set was used for the Medium-size basis set for estimation of ECCSD(T)(limit) for the methane clusters with naphthalene and pyrene.

It should be noted that calculated MP2/cc-pVTZ interaction energies of the

naphthalene-methane clusters (1a and 1f) are close to the estimated  $E_{\text{CCSD(T)}(\text{limit})}$  (Figure 2). The cc-pVTZ basis set underestimates the attraction compared to the basis set limit, while the MP2 method overestimates the attraction compared to the CCSD(T) method. Apparently an error cancellation is the cause of the good performance of the MP2/cc-pVTZ level calculations.

TABLE 1S. Calculated MP2 and CCSD(T) interaction energies for methane and ethane clusters with aromatic molecules<sup>a</sup>

| basis set, geometry                   | $E_{\text{HF}}^{\text{b}}$ | $E_{\text{MP2}}^{\text{b}}$ | $E_{\text{CCSD(T)}}^{\text{b}}$ | $E_{\text{corr(MP2)}}^{\text{c}}$ | $E_{\text{corr(CCSD(T))}}^{\text{d}}$ | $E_{\text{corr(CCSD(T))}}/$<br>$E_{\text{corr(MP2)}}$ |
|---------------------------------------|----------------------------|-----------------------------|---------------------------------|-----------------------------------|---------------------------------------|-------------------------------------------------------|
| naphthalene-methane <sup>e</sup>      |                            |                             |                                 |                                   |                                       |                                                       |
| 6-31G*                                |                            |                             |                                 |                                   |                                       |                                                       |
| <b>1a</b> R = 3.8 Å                   | 0.92                       | -0.48                       | -0.22                           | -1.40                             | -1.14                                 | 0.82                                                  |
| <b>1f</b> R = 3.6 Å                   | 1.13                       | -0.60                       | -0.28                           | -1.73                             | -1.41                                 | 0.82                                                  |
| <b>1g</b>                             | 1.22                       | -0.59                       | -0.25                           | -1.81                             | -1.47                                 | 0.81                                                  |
| cc-pVDZ                               |                            |                             |                                 |                                   |                                       |                                                       |
| <b>1a</b> R = 3.8 Å                   | 0.89                       | -0.91                       | -0.55                           | -1.80                             | -1.44                                 | 0.80                                                  |
| <b>1b</b> R = 3.6 Å                   | 1.24                       | -0.82                       | -0.44                           | -2.06                             | -1.69                                 | 0.82                                                  |
| <b>1c</b> R = 3.6 Å                   | 1.33                       | -0.89                       | -0.47                           | -2.23                             | -1.80                                 | 0.81                                                  |
| <b>1d</b> R = 3.8 Å                   | 1.13                       | -0.83                       | -0.43                           | -1.97                             | -1.56                                 | 0.79                                                  |
| <b>1e</b> R = 3.4 Å                   | 1.85                       | -1.00                       | -0.44                           | -2.85                             | -2.29                                 | 0.80                                                  |
| <b>1f</b> R = 3.4 Å                   | 2.05                       | -1.00                       | -0.36                           | -3.04                             | -2.41                                 | 0.79                                                  |
| pyrene-methane <sup>e</sup>           |                            |                             |                                 |                                   |                                       |                                                       |
| 6-31G                                 |                            |                             |                                 |                                   |                                       |                                                       |
| <b>3a</b>                             | 2.82                       | 0.28                        | 0.73                            | -2.54                             | -2.09                                 | 0.82                                                  |
| <b>3b</b>                             | 2.25                       | 0.06                        | 0.44                            | -2.19                             | -1.80                                 | 0.82                                                  |
| <b>3c</b>                             | 1.89                       | 0.02                        | 0.37                            | -1.87                             | -1.51                                 | 0.81                                                  |
| 6-31G*                                |                            |                             |                                 |                                   |                                       |                                                       |
| <b>3a</b>                             | 2.75                       | -0.48                       | 0.21                            | -3.24                             | -2.54                                 | 0.78                                                  |
| <b>3b</b>                             | 2.22                       | -0.55                       | 0.04                            | -2.77                             | -2.18                                 | 0.79                                                  |
| <b>3c</b>                             | 1.90                       | -0.44                       | 0.07                            | -2.34                             | -1.82                                 | 0.78                                                  |
| toluene-methane <sup>f</sup>          |                            |                             |                                 |                                   |                                       |                                                       |
| cc-pVDZ                               | 1.42                       | -0.80                       | -0.42                           | -2.21                             | -1.84                                 | 0.83                                                  |
| <i>p</i> -xylene-methane <sup>f</sup> |                            |                             |                                 |                                   |                                       |                                                       |

|                                  |      |       |       |       |       |      |
|----------------------------------|------|-------|-------|-------|-------|------|
| cc-pVDZ                          | 1.35 | -0.88 | -0.50 | -2.23 | -1.84 | 0.83 |
| mesitylene-methane <sup>f</sup>  |      |       |       |       |       |      |
| cc-pVDZ                          | 1.50 | -1.01 | -0.58 | -2.50 | -2.08 | 0.83 |
| benzene-methane                  |      |       |       |       |       |      |
| <b>2a</b> R = 3.8 Å <sup>c</sup> |      |       |       |       |       |      |
| 6-31G*                           | 0.85 | -0.30 | -0.10 | -1.15 | -0.96 | 0.83 |
| 6-311G*                          | 0.83 | -0.63 | -0.38 | -1.46 | -1.21 | 0.83 |
| 6-311G**                         | 0.82 | -0.83 | -0.54 | -1.65 | -1.36 | 0.83 |
| cc-pVDZ                          | 0.83 | -0.70 | -0.41 | -1.53 | -1.24 | 0.81 |
| cc-pVTZ                          | 0.84 | -1.42 | -1.06 | -2.25 | -1.90 | 0.84 |
| cc-pVDZ                          |      |       |       |       |       |      |
| <b>2b</b> R = 3.6 Å <sup>c</sup> | 1.39 | -0.43 | -0.15 | -1.81 | -1.53 | 0.85 |
| <b>C</b> R = 3.6 Å <sup>g</sup>  | 1.47 | -0.49 | -0.17 | -1.96 | -1.63 | 0.83 |
| <b>D</b> R = 4.4 Å <sup>g</sup>  | 0.59 | -0.47 | -0.29 | -1.07 | -0.89 | 0.83 |
| <b>E</b> R = 4.4 Å <sup>g</sup>  | 0.58 | -0.52 | -0.33 | -1.10 | -0.91 | 0.83 |
| <b>F</b> R = 3.6 Å <sup>g</sup>  | 1.10 | -0.40 | -0.17 | -1.49 | -1.27 | 0.85 |
| Benzene-ethane <sup>g</sup>      |      |       |       |       |       |      |
| cc-pVDZ                          |      |       |       |       |       |      |
| <b>G</b> R = 3.6 Å               | 1.52 | -0.57 | -0.26 | -2.08 | -1.78 | 0.85 |
| <b>H</b> R = 3.6 Å               | 1.77 | -0.85 | -0.35 | -2.62 | -2.12 | 0.81 |

<sup>a</sup> Energies in kcal/mol.

<sup>b</sup> BSSE corrected interaction energies.

<sup>c</sup> MP2 correlation interaction energies [=  $E_{\text{MP2}} - E_{\text{HF}}$ ].

<sup>d</sup> CCSD(T) correlation interaction energies [=  $E_{\text{CCSD(T)}} - E_{\text{HF}}$ ].

<sup>e</sup> The geometries of the clusters are shown in Figs. 1, 4 and 5.

<sup>f</sup> MP2/aug(d,p)-6-311G\*\* level optimized geometries were used. Ref. 22.

<sup>g</sup> Ref 14.

TABLE 2S. MP2 interaction energies and estimated MP2 interaction energies at the basis set limit for methane clusters with naphthalene, pyrene and coronene<sup>a</sup>

|                     | $E_{\text{MP2}}^{\text{b}}$ |         |         |             |             | $E_{\text{MP2}}(\text{limit})^{\text{c}}$ |                 |                    |
|---------------------|-----------------------------|---------|---------|-------------|-------------|-------------------------------------------|-----------------|--------------------|
|                     | cc-pVDZ                     | cc-pVTZ | cc-pVQZ | aug-cc-pVDZ | aug-cc-pVTZ | DT <sup>d</sup>                           | TQ <sup>e</sup> | augDT <sup>f</sup> |
| naphthalene-methane |                             |         |         |             |             |                                           |                 |                    |
| <b>1a</b> R = 3.8 Å | -0.91                       | -1.66   | -1.90   | -1.78       | -1.95       | -1.98                                     | -2.07           | -2.03              |
| <b>1f</b> R = 3.6 Å | -1.21                       | -2.15   | -2.44   | -2.32       | -2.52       | -2.55                                     | -2.65           | -2.60              |
| <b>1g</b>           | -1.11                       | -2.32   | -2.55   | -2.44       | -2.64       | -2.83                                     | -2.79           | -2.73              |
| pyrene-methane      |                             |         |         |             |             |                                           |                 |                    |
| <b>3a</b>           | -1.72                       | -3.00   |         |             |             | -3.54                                     |                 |                    |
| <b>3b</b>           | -1.55                       | -2.64   |         |             |             | -3.10                                     |                 |                    |
| <b>3c</b>           | -1.40                       | -2.41   |         |             |             | -2.84                                     |                 |                    |

<sup>a</sup> Energies in kcal/mol. Geometries of the clusters are shown in Figs. 1, 4 and 5.

<sup>b</sup> BSSE corrected MP2 interaction energies.

<sup>c</sup> Estimated MP2 interaction energies at the basis set limit by Helgaker's method.

<sup>d</sup> Estimated  $E_{\text{MP2}}$  values from  $E_{\text{MP2}}$  calculated with cc-pVXZ (X = D and T) basis sets. See text.

<sup>e</sup> Estimated  $E_{\text{MP2}}$  values from  $E_{\text{MP2}}$  calculated with cc-pVXZ (X = T and Q) basis sets. See text.

<sup>f</sup> Estimated  $E_{\text{MP2}}$  values from  $E_{\text{MP2}}$  calculated with aug-cc-pVXZ (X = D and T) basis sets. See text.

TABLE 3S. Estimated CCSD(T) interaction energies at the basis set limit by ARS-E model using 6-31G\* basis set as Medium-size basis set for methane clusters with naphthalene, pyrene and coronene <sup>a</sup>

| Dimer               | $E_{\text{HF}(\text{limit})}^{\text{b}}$           | $E_{\text{MP2}(\text{limit})}^{\text{c}}$          | $E_{\text{corr}(\text{MP2})(\text{limit})}^{\text{d}}$   | $E_{\text{HF}(\text{M})}^{\text{e}}$                     | $E_{\text{MP2}(\text{M})}^{\text{e}}$                  | $E_{\text{CCSD}(\text{T})(\text{M})}^{\text{e}}$     |
|---------------------|----------------------------------------------------|----------------------------------------------------|----------------------------------------------------------|----------------------------------------------------------|--------------------------------------------------------|------------------------------------------------------|
| naphthalene-methane |                                                    |                                                    |                                                          |                                                          |                                                        |                                                      |
| <b>1a</b>           | 0.90                                               | -1.98                                              | -2.88                                                    | 0.92                                                     | -0.48                                                  | -0.22                                                |
| <b>1f</b>           | 1.04                                               | -2.55                                              | -3.58                                                    | 1.13                                                     | -0.60                                                  | -0.28                                                |
| <b>1g</b>           | 1.12                                               | -2.66                                              | -3.77                                                    | 1.22                                                     | -0.59                                                  | -0.25                                                |
| pyrene-methane      |                                                    |                                                    |                                                          |                                                          |                                                        |                                                      |
| <b>3a</b>           | 1.48                                               | -3.54                                              | -5.02                                                    | 1.61                                                     | -0.89                                                  | -0.35                                                |
| <b>3b</b>           | 1.32                                               | -3.10                                              | -4.42                                                    | 1.42                                                     | -0.82                                                  | -0.34                                                |
| <b>3c</b>           | 1.28                                               | -2.84                                              | -4.12                                                    | 1.34                                                     | -0.77                                                  | -0.31                                                |
| Dimer               | $\Delta\text{CCSD}(\text{T})(\text{M})^{\text{f}}$ | $E_{\text{corr}(\text{MP2})(\text{M})}^{\text{g}}$ | $\Delta(\text{M})E_{\text{corr}(\text{MP2})}^{\text{h}}$ | $\Delta(\text{M})\Delta\text{CCSD}(\text{T})^{\text{i}}$ | $\Delta\text{CCSD}(\text{T})(\text{limit})^{\text{j}}$ | $E_{\text{CCSD}(\text{T})(\text{limit})}^{\text{k}}$ |
| naphthalene-methane |                                                    |                                                    |                                                          |                                                          |                                                        |                                                      |
| <b>1a</b>           | 0.26                                               | -1.40                                              | 1.48                                                     | 0.30                                                     | 0.55                                                   | -1.42                                                |
| <b>1f</b>           | 0.32                                               | -1.73                                              | 1.86                                                     | 0.37                                                     | 0.69                                                   | -1.86                                                |
| <b>1g</b>           | 0.34                                               | -1.81                                              | 1.96                                                     | 0.39                                                     | 0.73                                                   | -1.92                                                |
| pyrene-methane      |                                                    |                                                    |                                                          |                                                          |                                                        |                                                      |
| <b>3a</b>           | 0.54                                               | -2.50                                              | 2.52                                                     | 0.50                                                     | 1.04                                                   | -2.50                                                |
| <b>3b</b>           | 0.48                                               | -2.24                                              | 2.18                                                     | 0.44                                                     | 0.92                                                   | -2.18                                                |
| <b>3c</b>           | 0.46                                               | -2.11                                              | 2.01                                                     | 0.40                                                     | 0.86                                                   | -1.97                                                |

<sup>a</sup> Energies in kcal/mol. Geometries of the clusters are shown in Figs. 1, 4 and 5.  $R = 3.8 \text{ \AA}$  for **1a** and  $R = 3.6 \text{ \AA}$  for **1f**.

<sup>b</sup> HF interaction energies at the basis set limit. HF/aug-cc-pVTZ interaction energies were used for the naphthalene clusters. HF/cc-pVTZ interaction energies were used for other clusters. See text.

<sup>c</sup> Estimated MP2 interaction energies at the basis set limit by Helgaker's method. See text.

<sup>d</sup> MP2 correlation interaction energies at the basis set limit [=  $E_{\text{MP2}(\text{limit})} - E_{\text{HF}(\text{limit})}$ ]. See text.

<sup>e</sup> HF, MP2 and CCSD(T) interaction energies calculated using the Medium size basis

sets (6-31G\* basis set). See text.

f CCSD(T) correction terms calculated using the Medium size basis set [= ECCSD(T)(M) - EMP2(M)]. See text.

g MP2 correlation interaction energies calculated using the Medium size basis set [= EMP2(M) - EHF(M)]. See text.

h Underestimation of MP2 correlation interaction energies by the Medium size basis set [=  $E_{\text{corr}}(\text{MP2})(\text{limit}) - E_{\text{corr}}(\text{MP2})(\text{M})$ ]. See text.

i Estimated underestimation of CCSD(T) correction terms by the Medium size basis set [=  $-0.2 \times \Delta(\text{M})E_{\text{corr}}(\text{MP2})$ ]. See text.

j Estimated CCSD(T) correction terms at the basis set limit [=  $\Delta\text{CCSD(T)}(\text{M}) + \Delta(\text{M})\Delta\text{CCSD(T)}$ ]. See text.

k Estimated CCSD(T) interaction energies at the basis set limit [=  $E_{\text{MP2}}(\text{limit}) + \Delta\text{CCSD(T)}(\text{limit})$ ]. See text.
